# Supplementary material
Source: PubMed Central journal article supplement (PMC4104913)
Supplement: 1401631111_pnas.1401631111.sapp.pdf [file 1401631111_pnas.1401631111.sapp.pdf]

## Supporting Information:

**Figure S1.** Plasmid copy number effects *PemrR*-GFP biosensor activation. Compound dependent activation of the *PemrR*-GFP biosensor was assessed after 2 hrs under single copy (BLUE) and high-copy (PINK) number for concentrations of 0.25 and 1mM. Error bars represent 95% confidence intervals (n=3).

**Figure S2.** Screening environmental isolates with the *PemrR*-GFP biosensor. Soil isolates, including known lignin degraders *R. jostii* RHA1 and *E. lignolyticus* SCF1, were cultured in the presence of HP-L™ for 2 weeks with (PINK) and without (BLUE) a solid phase of 0.4% agarose. Culture supernatant was then added to a *PemrR*-GFP biosensor culture and incubated for 2 hrs before measuring fluorescence. Error bars represent 95% confidence intervals (n=3).

**Figure S3.** (A) *emrRAB* promoter activation in *emrR* and *emrB* knockout backgrounds. Time course GFP fluorescence measurements for 1 mM of vanillin (PINK), vanillic acid (BLUE), and vanillyl alcohol (BLACK) in wild-type, *emrR* and *emrB* knockout backgrounds (n=3). (B) Growth kinetics of *emrR* and *emrB* knockouts using sub-inhibitory concentrations of monoaromatic compounds. Wild-type (BLACK), *emrR* (-) (PINK), and *emrB*(-) (BLACK) strains were grown in the presence of 0.5 mM of various monoaromatic compounds (n=3).

**Figure S4.** (A) Effect of *emrR* knockout on growth kinetics in the presence of enzyme treated lignin. The effect of 0.5 g/L of SF-HKL (PINK) and DypB N246A treated SF-HKL (BLUE) in *emrR* and *emrB* knockout backgrounds (n=3). (B) EmrR overexpression improves growth kinetics of *E. coli* exposed to inhibitory levels of monoaromatic compounds. Growth kinetics with uninduced (BLUE) and induced (PINK) expression of EmrR from high-copy plasmid pBAD24. Error bars represent 95% confidence intervals (n=3).

**Figure S5.** (A) Taxonomic distribution of fosmid end sequences. Fosmid end sequences were phylogenetically assigned using SOrt-ITEMS for CO182 (12,630 sequences) and CO182 (12,599 sequences). (B) Fosmid library screening by co-culture with the *PemrR*-GFP biosensor for 8 x 384-well plates with selected hits (PINK). (C) Validation of select fosmid clones by repeat screening. Error bars represent 95% confidence intervals (n=3).

**Figure S6.** Precipitation phenotypes. Various fosmid clones incubated alone or in combination with SF-HKL or HP-L™ in minimal media for 16 hrs.

**Figure S7.** Genetic context maps for active fosmids. Functional classes related to lignin degradation, CAZy auxiliary enzymes, mobile elements, transposon insertions, and tRNAs are annotated. Transposon insertions that caused a statistically significant decrease in GFP signal were identified using a Z-score ratio. The G+C ratio for every 200 nucleotides and gene abundance determined by mapping over 500 million Illumina HiSeq reads sourced from the coal bed milieu is also displayed. Connections represent protein homologs with minimum 50% identity and an e-value of 10E-20. Due to size limitations, a gap was inserted in fosmid CO182\_08\_C21 and the complete fosmid structure is represented in Figure S10.

**Figure S8.** (A) GC-MS of SF-HKL incubated with the clone 182\_08\_C21 (BLUE) and its transposon mutants at the position 4949 (black) and 55060 (BLACK). Insertion mutants reducing or abolishing lignin transformation, including insertions in *copA*, were identified by screening with the *PemrR*-GFP biosensor. The data was normalized to an empty fosmid clone. Products identified using a catalogue search included 2,4-dihydroxybenzoic acid ( $t_r$  12.4), 1,4-dihydroxy-2,6-dimethoxybenzene ( $t_r$  13.5) and benzoic acid ( $t_r$  15.7) (n = 2). (B) Structure based sequence alignment of CopA generated using 3D-Coffee. The structures of MCOs from six different organisms: *Homo sapiens* (PDB ID: 1KCW), *Streptomyces viridosporus* T7A (PDB ID: 3TAS), a marine metagenome (PDB ID: 4F7K), and *Thermus thermophilus* (PDB ID: 2XU9) were selected from the protein data bank. The resulting alignment was edited manually to show the structurally conserved regions. The copper binding motifs (HxHx, HxH, HxxHxH and

HCHxxxHxxxxM/L/F) are highlighted in the red box. (C) SDS-PAGE of CopA. Lane 1, protein molecular weight marker; lane 2, total protein; lane 3, soluble portion; lane 4, eluate from Ni-NTA column. (D and E) CopA-catalyzed oxidation of 2,6-DMP. Reaction mixtures contained 1 mM 2,6-DMP, 1% DMSO and either 30 nM CopA and 5 mM CuSO<sub>4</sub> or 200 nM CopA (E) (20 mM sodium phosphate, pH 8, 25 °C). No enzyme controls are shown in black.

**Figure S9.** Comparative gene content analysis of active fosmid clones conferring lignin transformation phenotypes. Histogram depicting annotated genes within the six functional classes implicated in (A) lignin transformation phenotypes (out of 813 total genes) or (B) mobile genetic elements. Circos representations showing nucleotide and protein level homology using all-against-all blastn (RED connections, E-value cutoff 10E-5) and tblastn (BLUE connections, E-value cutoff 10E-50), respectively.

**Figure S10.** The gene content of several active fosmid clones maps to the flexible genomes of sequenced reference strains. The percent identity of reciprocal best blast hits (RBHs) between *Pseudomonas strutzeri* A1501 and *P. strutzeri* ATCC 17588 is plotted with respect to their location in the A1501 genome to identify the core and non-shared regions. Red vertical bars indicate regions where three or more consecutive fosmid genes map to the A1501 genome with greater than 60% protein identity. Green ORFs represent fosmid derived sequences, blue ORFs represent related *P. strutzeri* A1501 sequences, and grey connections between genes indicates percent identity between proteins greater than 60%.

**Figure S11.** A conceptual model for bacterial lignin transformation based on horizontal gene transfer and gene shuffling. Related organisms generate different monoaromatic lignin transformation products based on the arrangement, repeat structure and diversity of the 6 functional classes identified in this study. HGT events can augment or reprogram functional arrays giving rise to synergistic capabilities reflected in a new monoaromatic transformation profile. In step 1, protein secretion machinery allows for the export of both lignin transforming enzymes and those generating reactive oxygen species such as

hydrogen peroxide. Monoaromatic products are alleviated from the lignin polymer and enter or leave the cell via small molecule transporters, which often fall within the multidrug efflux superfamily (Step 2). Signal transducers (with PAS domains) recognize different components of lignin structure (or resulting redox state) (Step 3) and integrate this information (along with breakdown products) to modulate expression via a transcription factor (such as an EmrR homolog)(Step 4). Finally, Step 5 shows how chemotaxis can also be affected through MCPs to bias movement towards or away from the lignin structure or products to maximize enzyme activity while protecting the cell from free radical damage.

**Table S1.** Quantification of select compounds in  $\text{mg L}^{-1}$  calculated from standard curves on GC-MS.

**Table S2.** Summary of fosmid annotations, evidence of secretion and class assignments. Domains are also annotated to support functional class assignment.



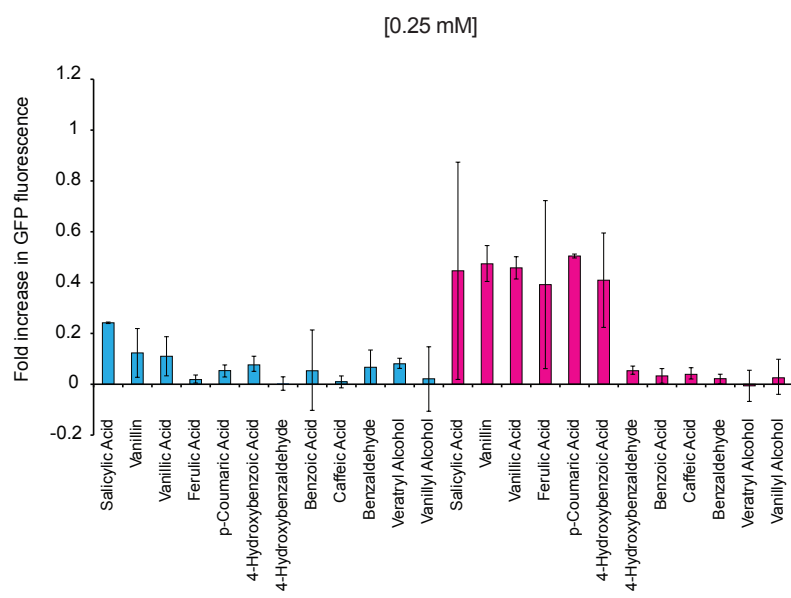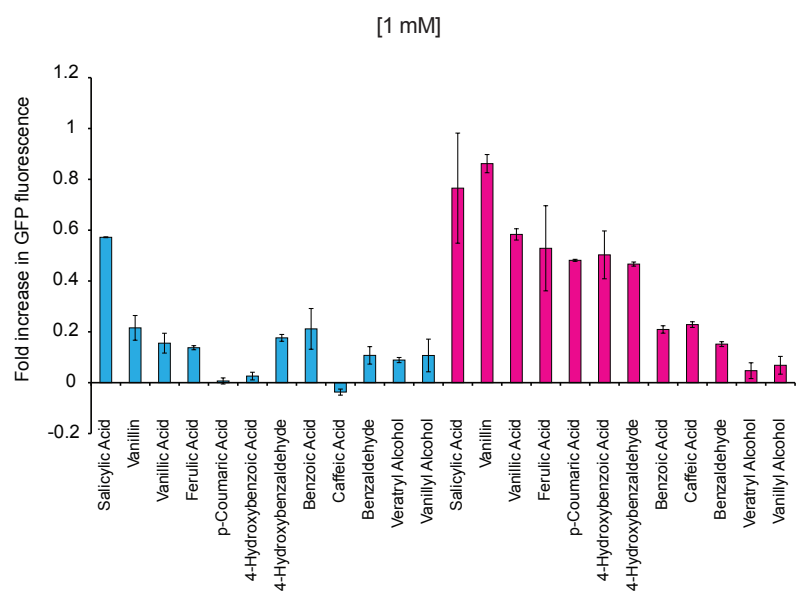

Fig. S1

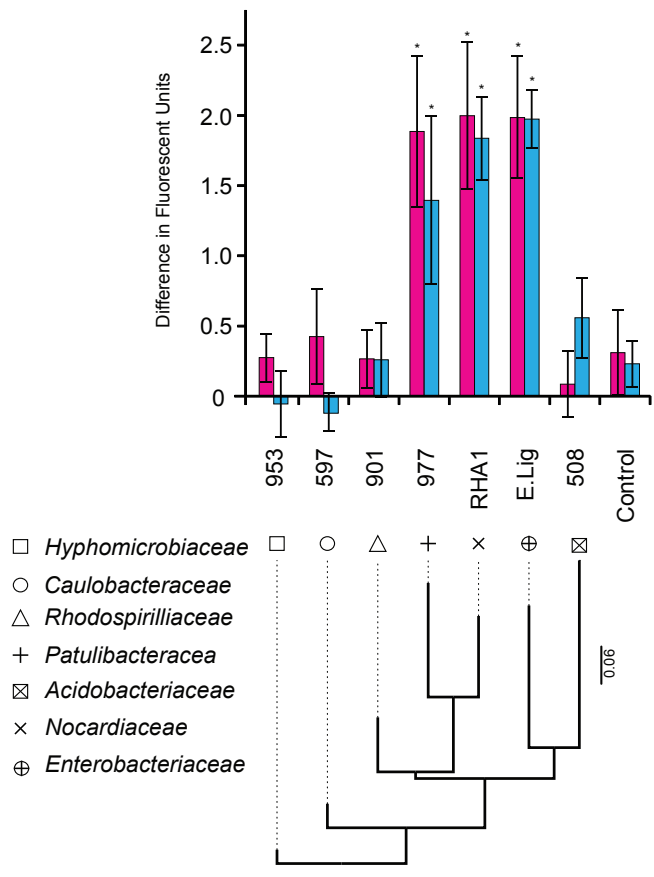

Fig. S2

**A**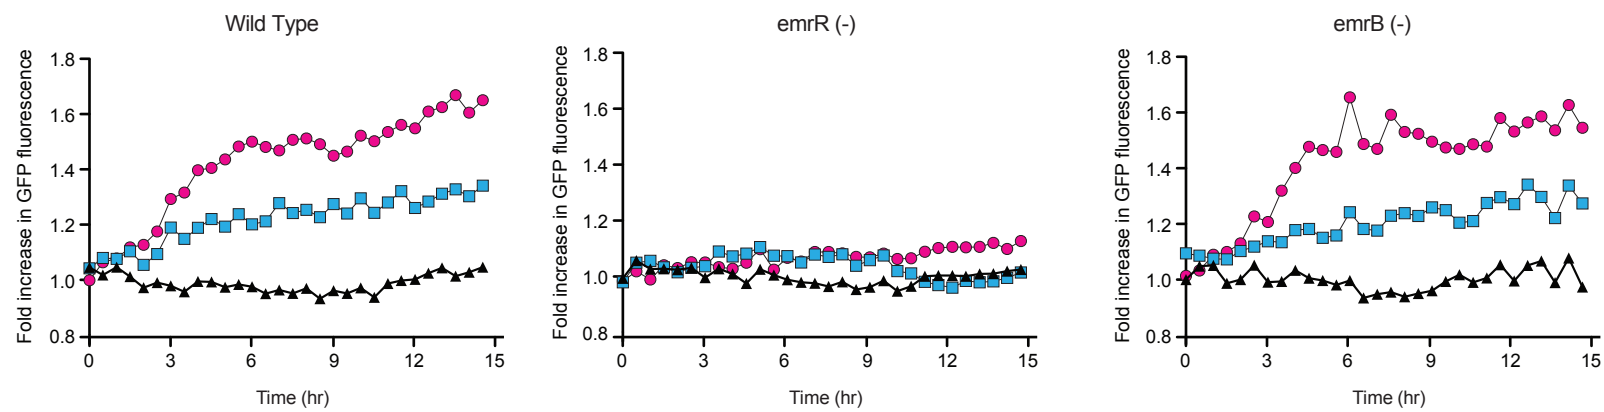**B**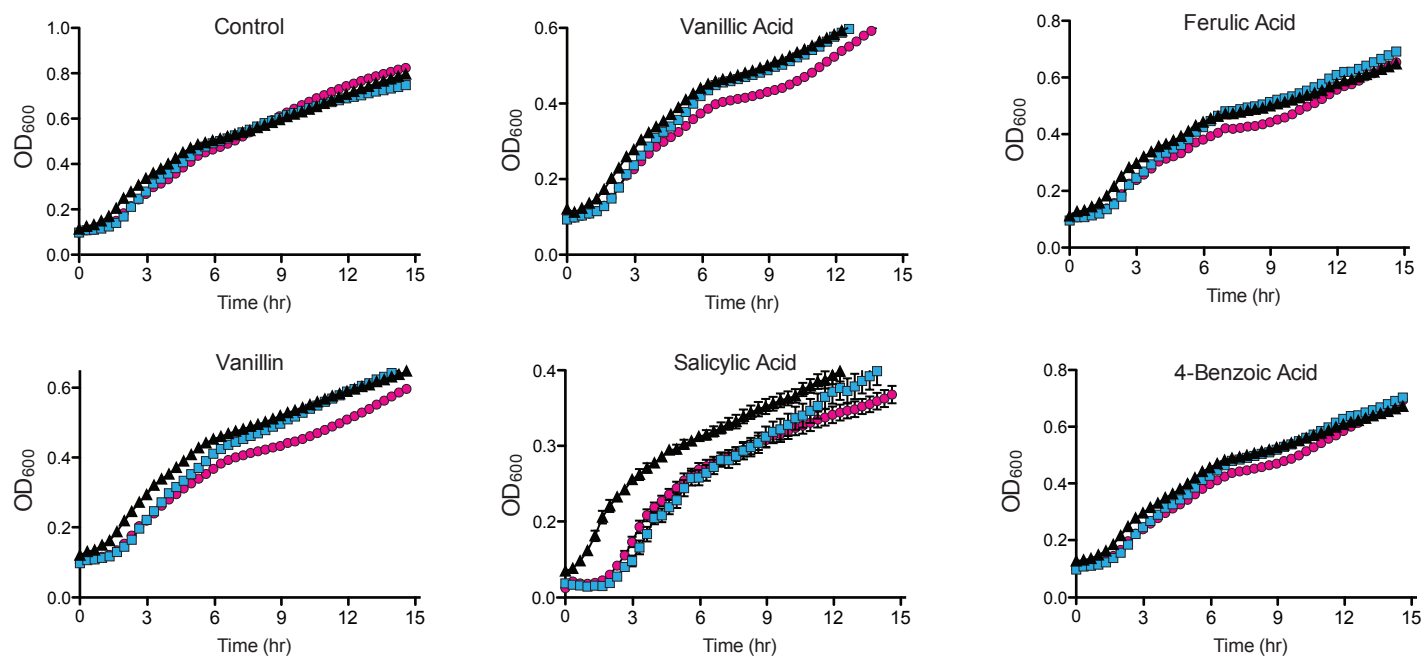

**A**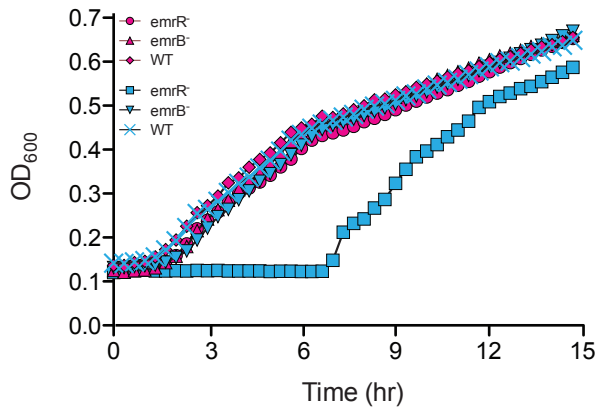**B**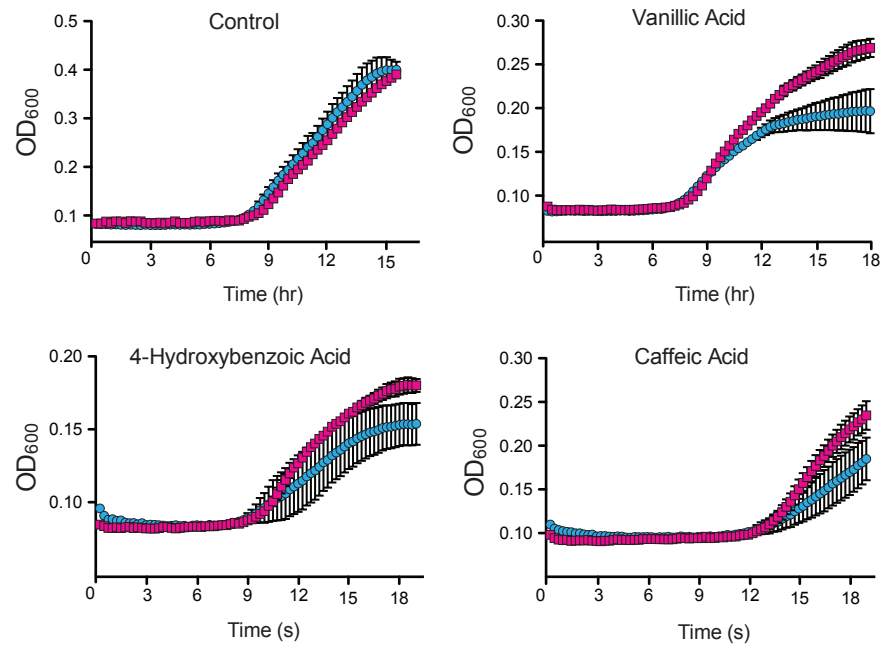

**A**

CO182

CO183

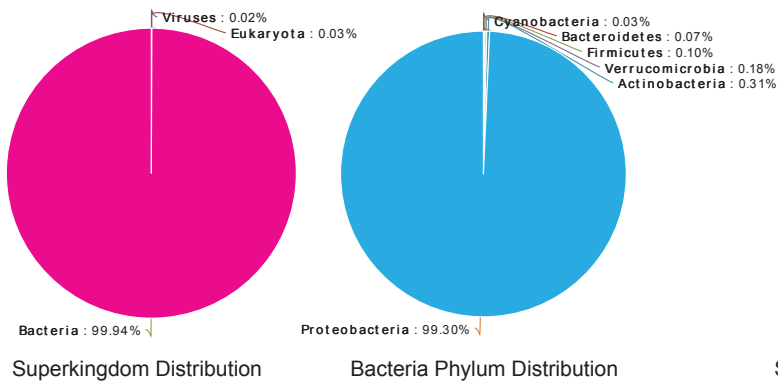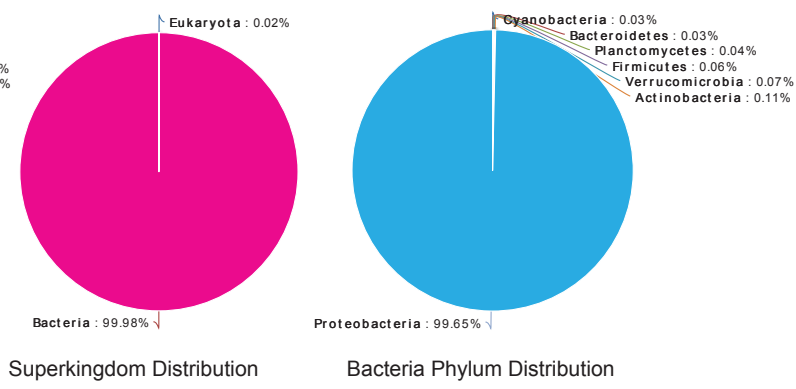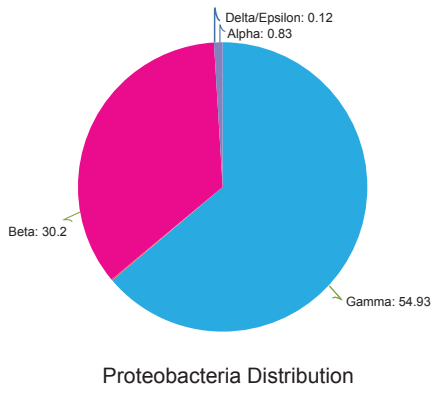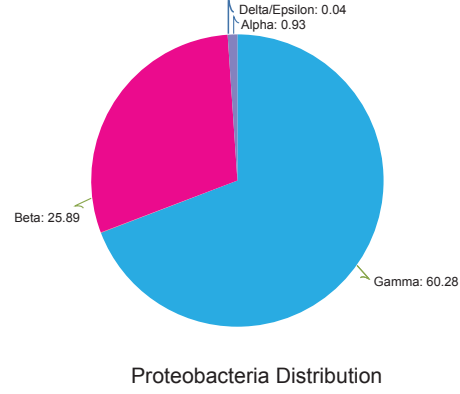

**B**

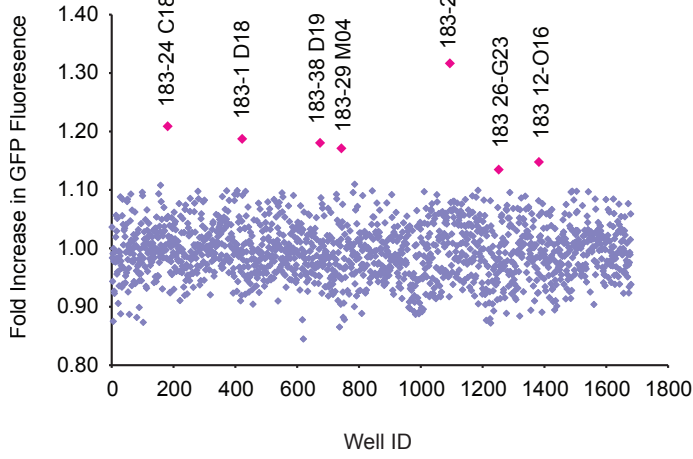

**C**

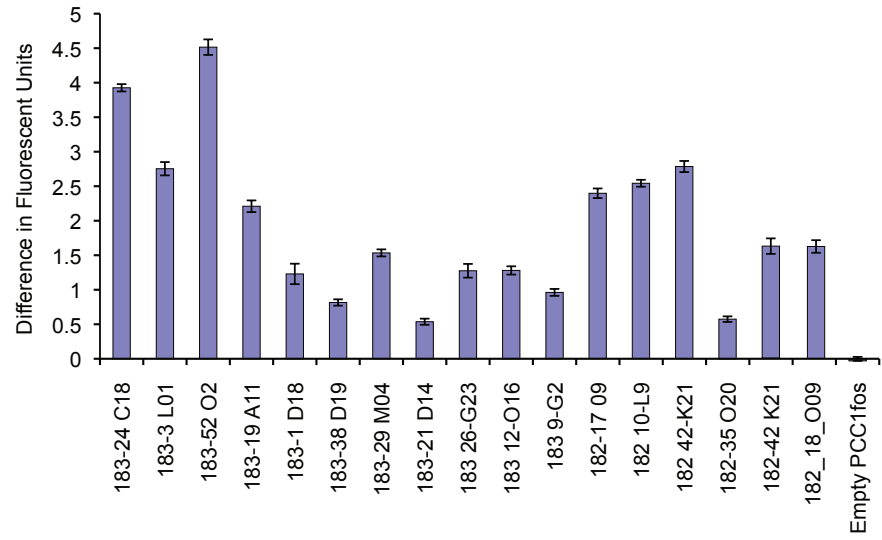

Fig. S5

SF-HKL

HP-L

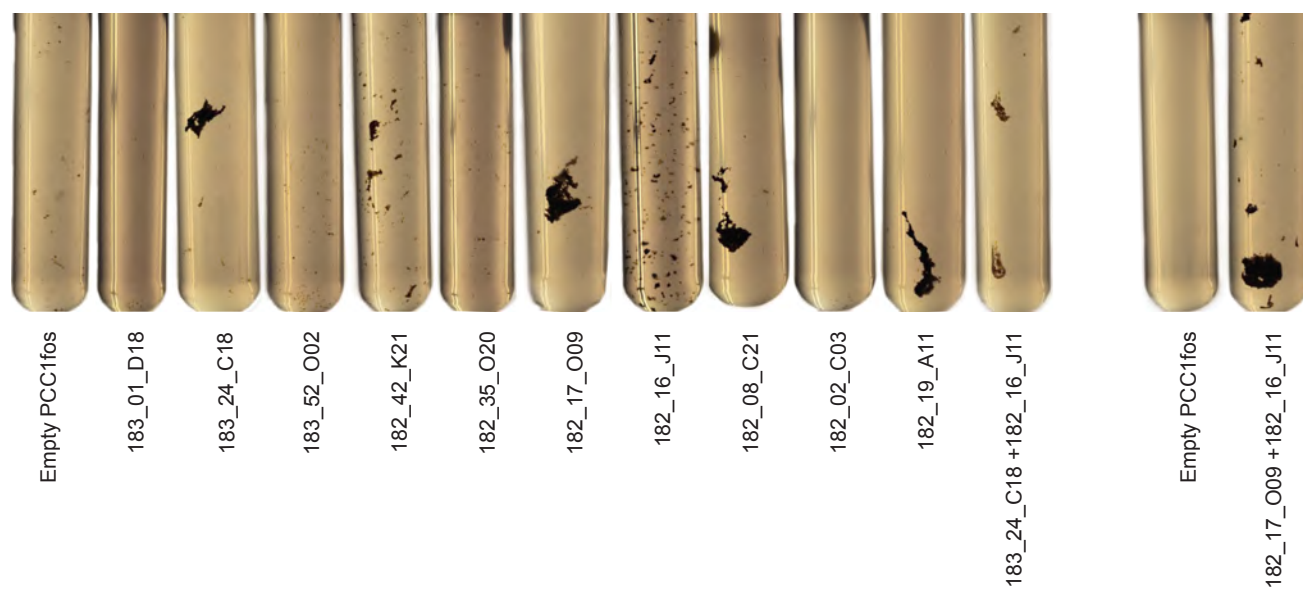

Fig. S6

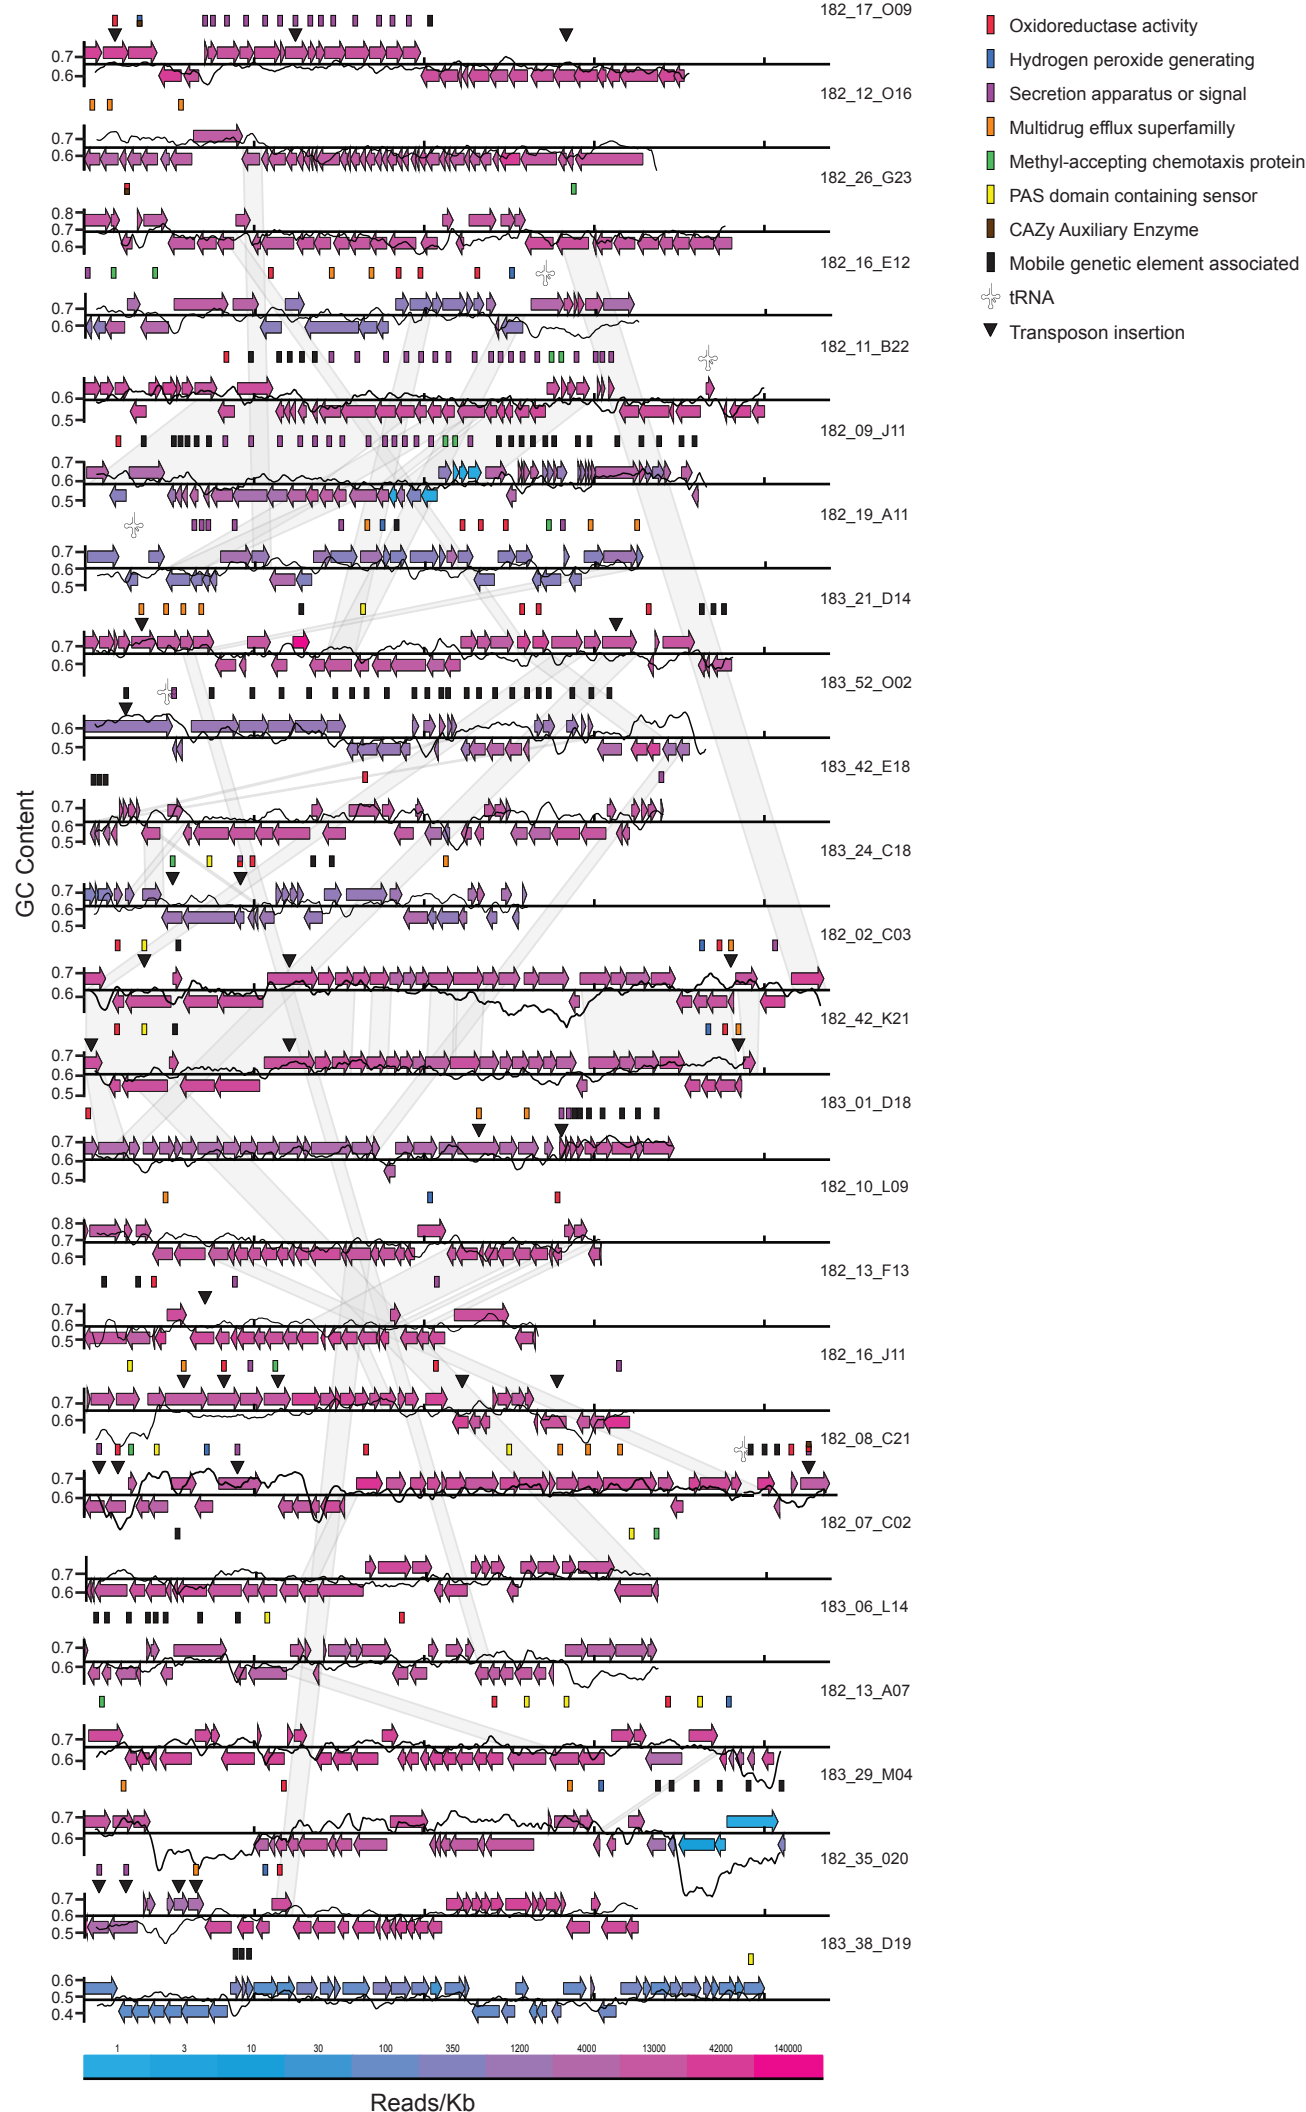

Fig. S7

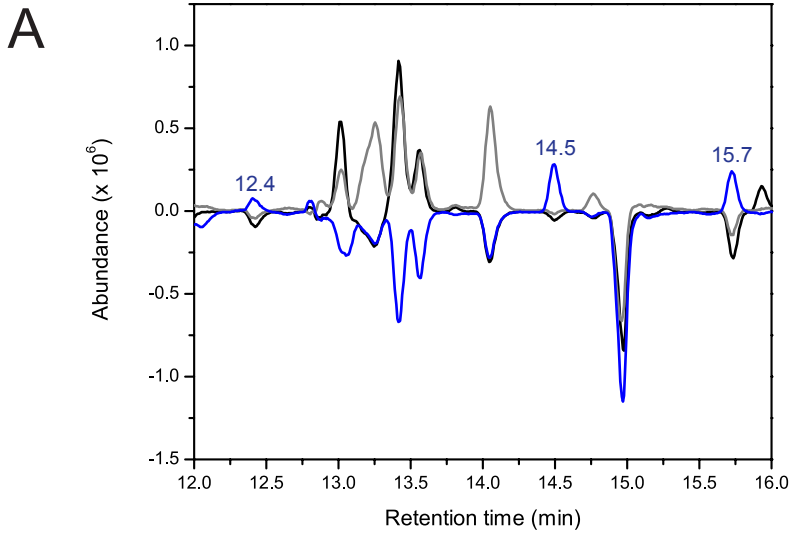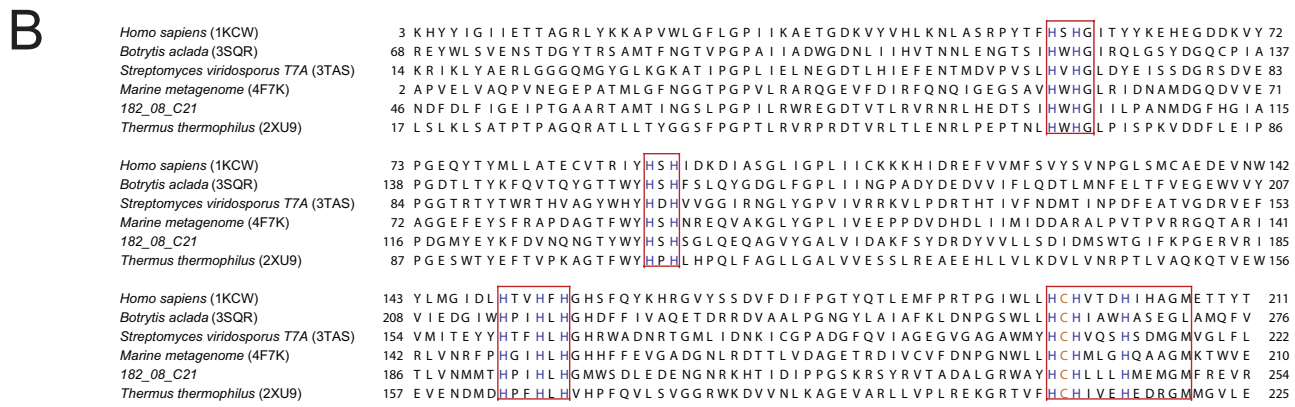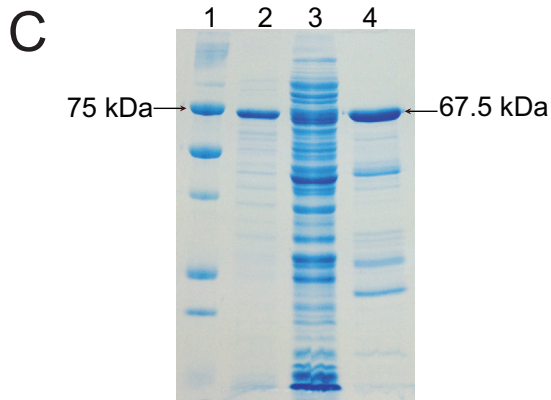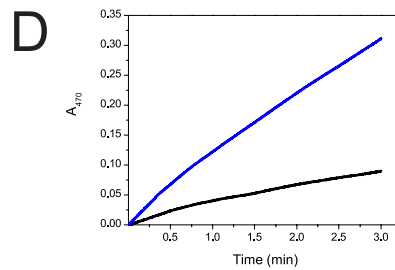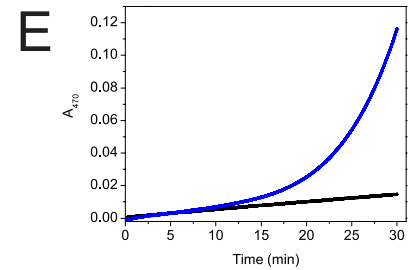

Fig. S8



**A**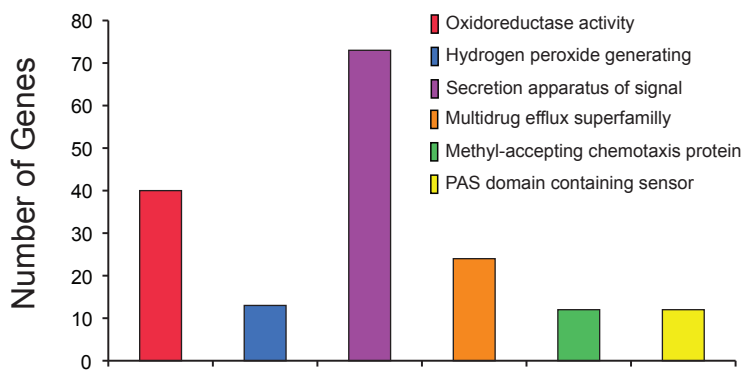**B**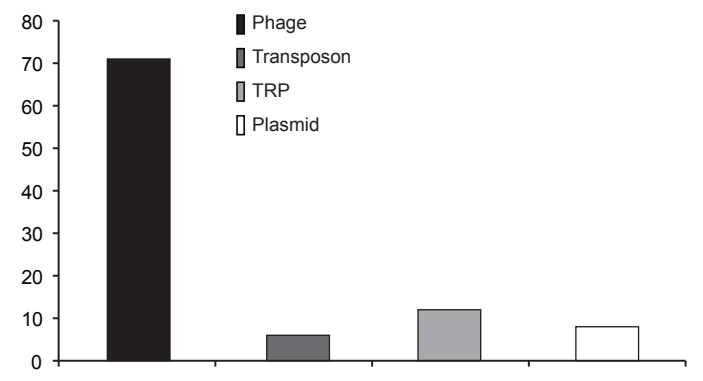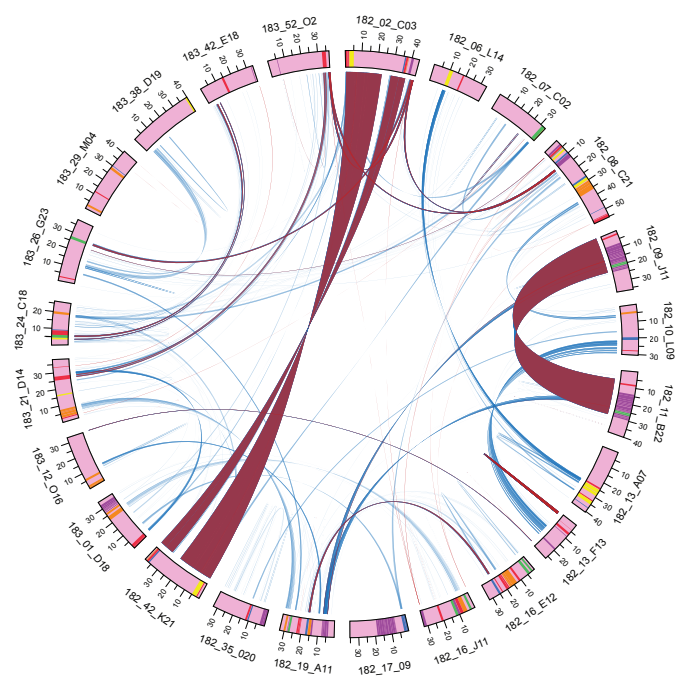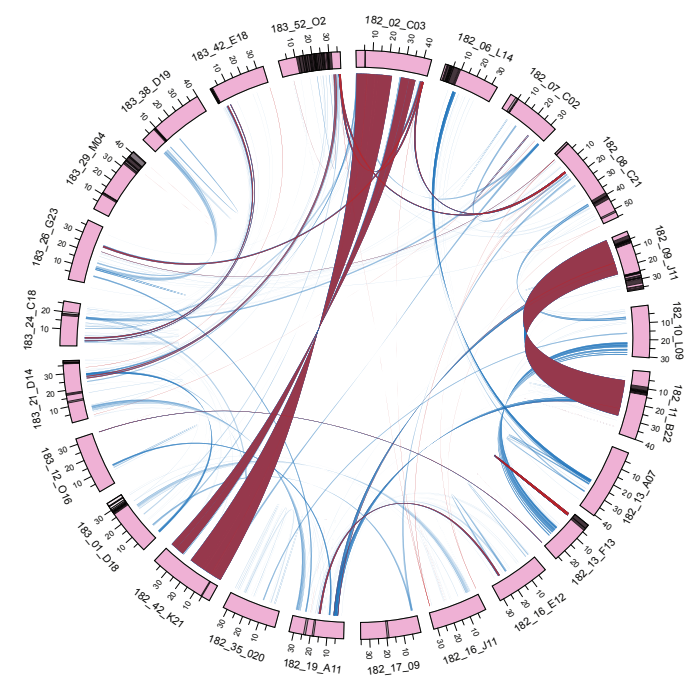

Fig. S9

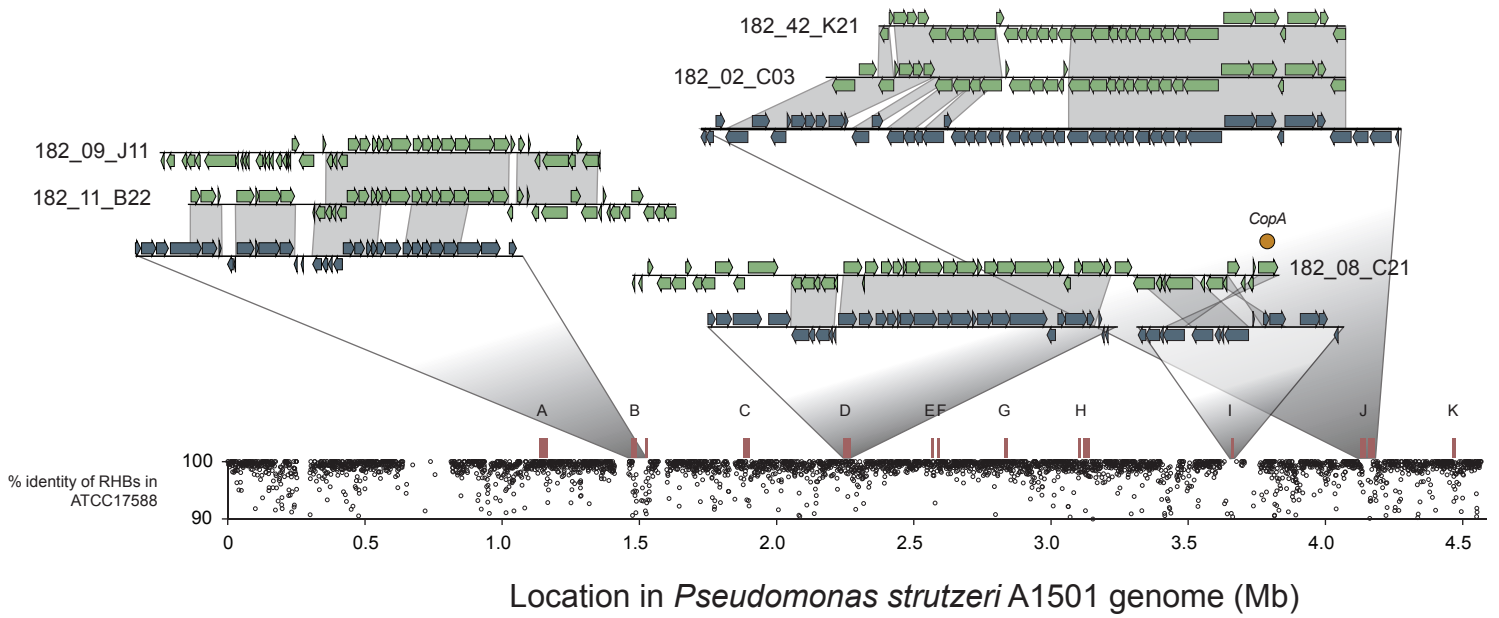

### Fosmid ID

|   |                        |
|---|------------------------|
| A | 182_35_020             |
| B | 182_09_J11, 182_11_B22 |
| C | 182_17_09              |
| D | 182_08_C21             |
| E | 182_06_L14             |
| F | 182_16_E12             |
| G | 182_13_F13             |
| H | 182_13_A07             |
| I | 182_08_C21             |
| J | 182_02_C03, 182_42_K21 |
| K | 182_16_J11             |

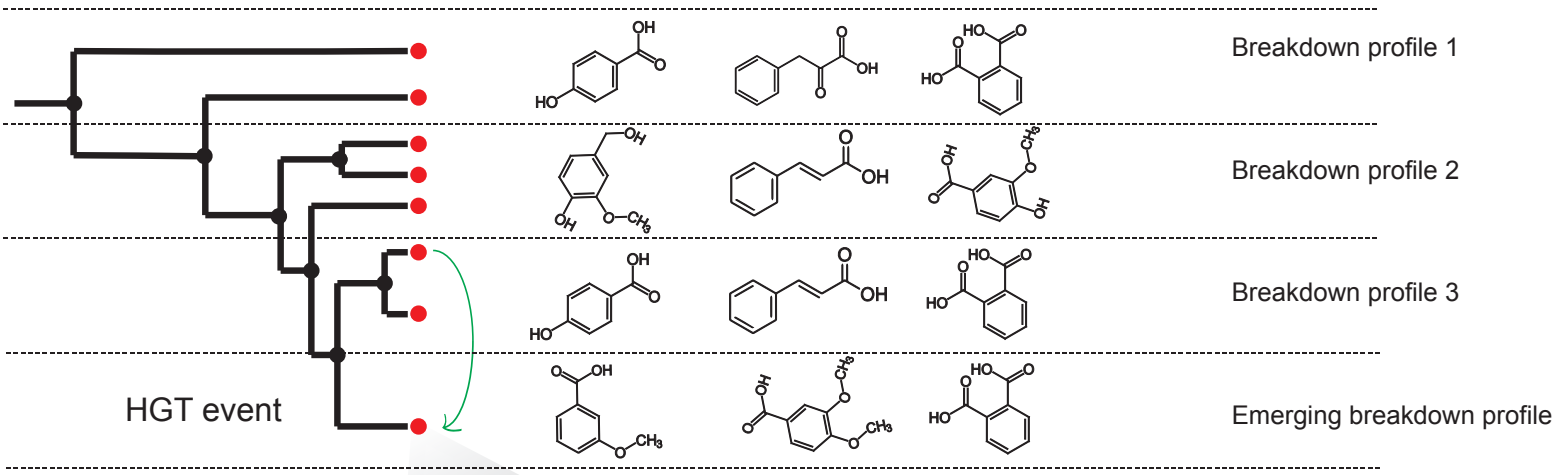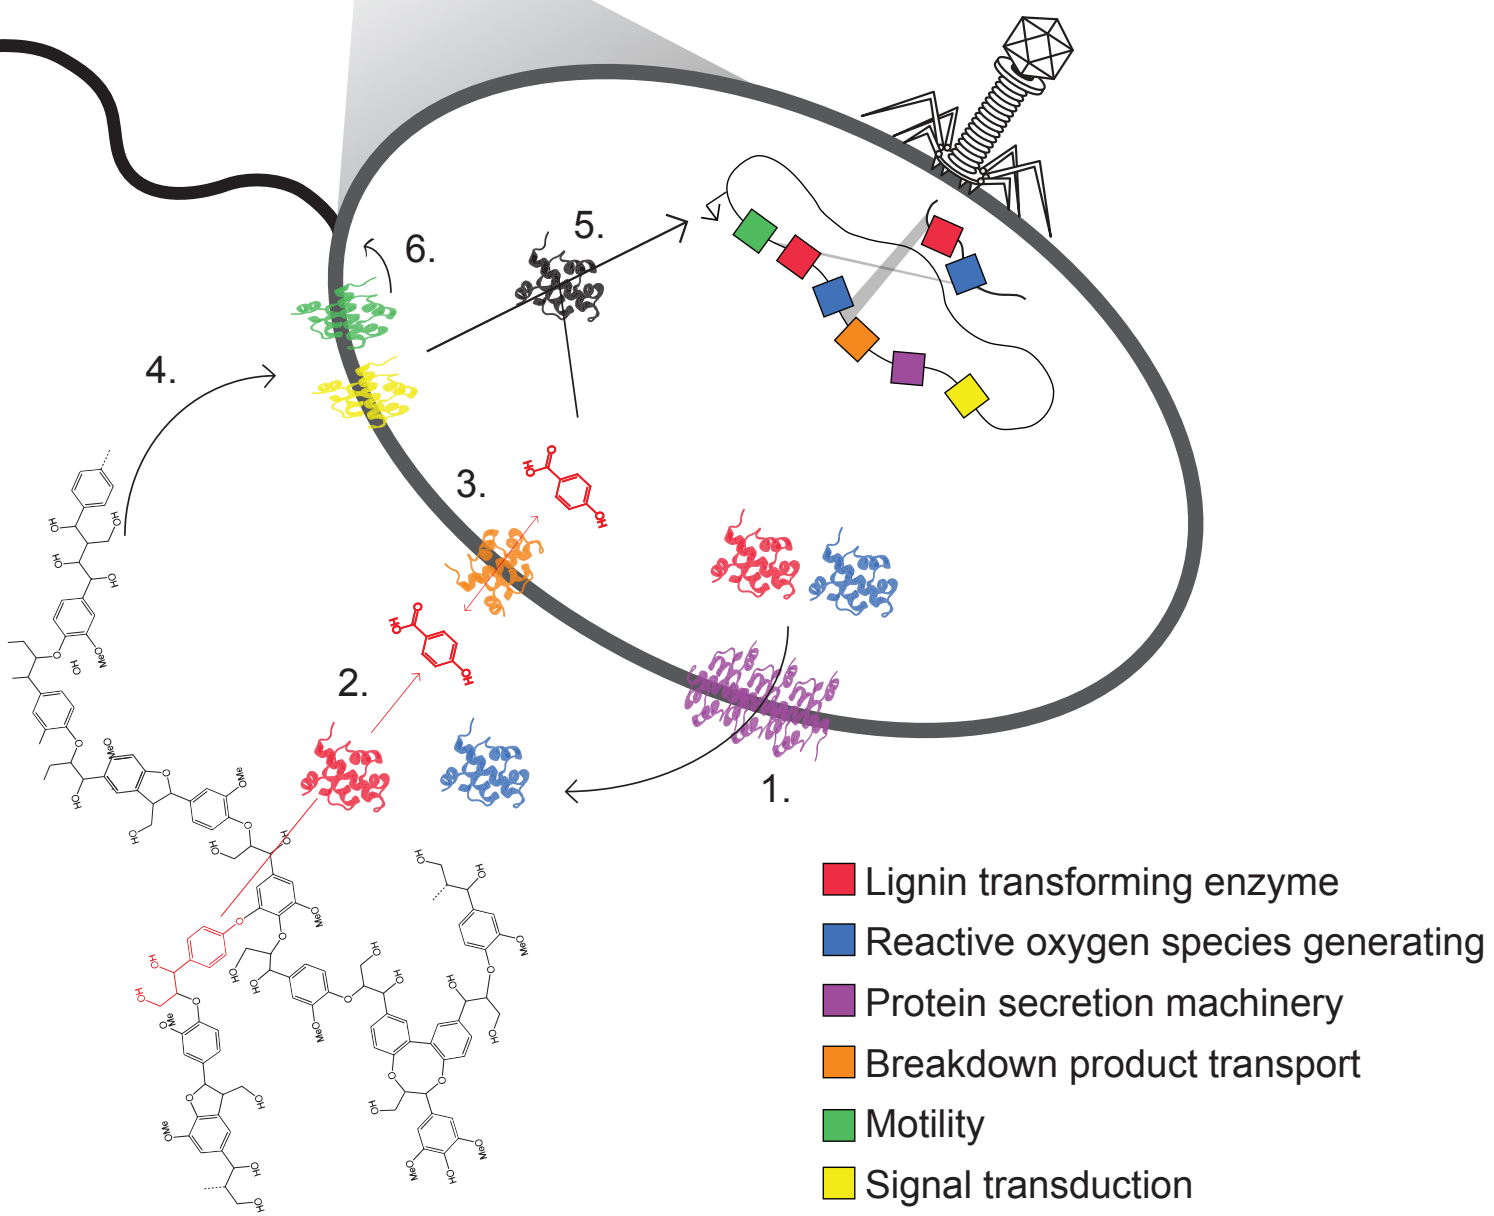

Fig. S11
